# Supplementary material for: Differential regulation of actin microfilaments by human MICAL proteins
Source: Oxford University Press journal article supplement (doi:10.1242/jcs.089367), 2012-02-01

# Supplementary Fig. 1

**A**

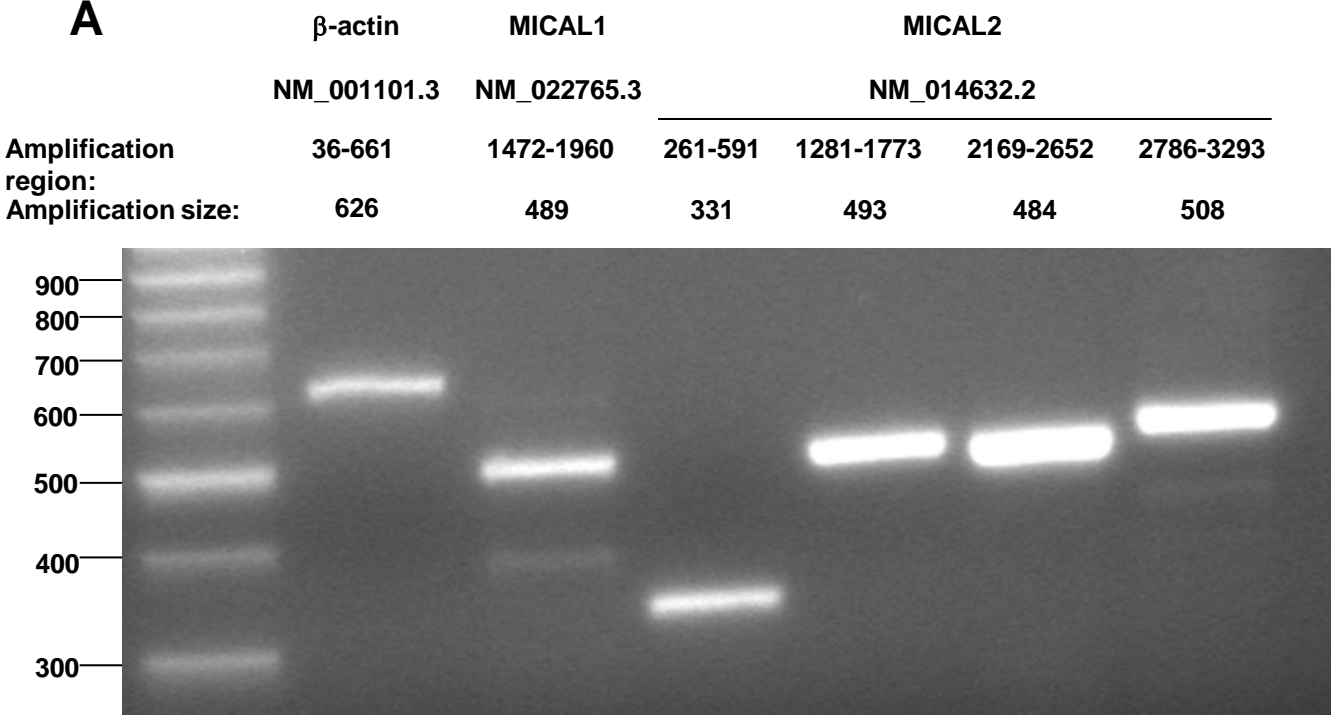

**B**

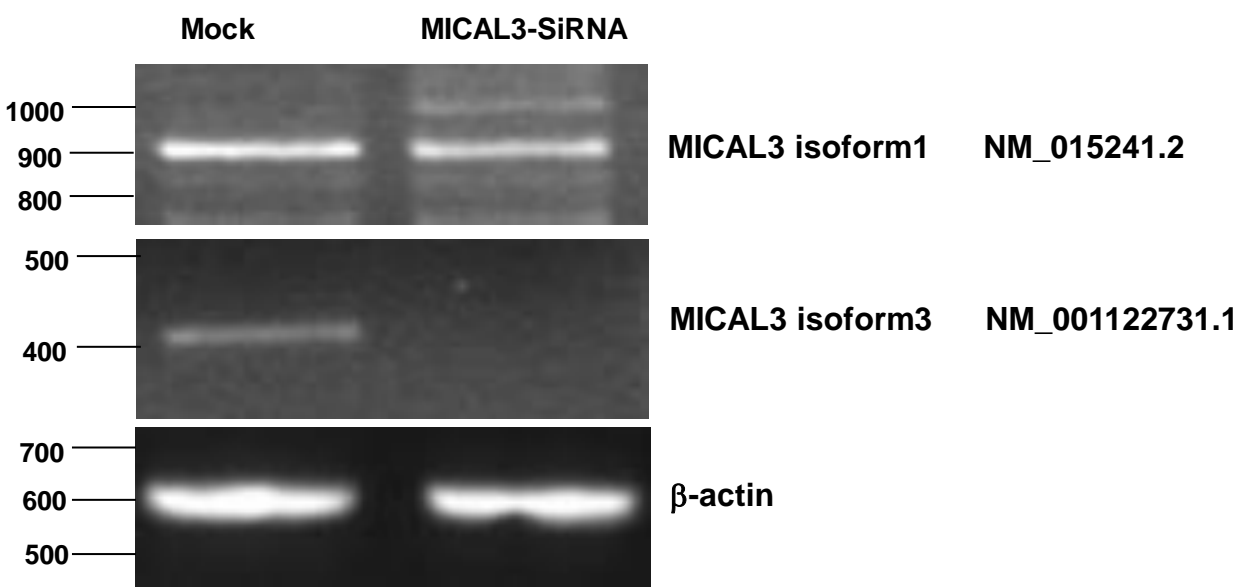

Supplementary Fig.2

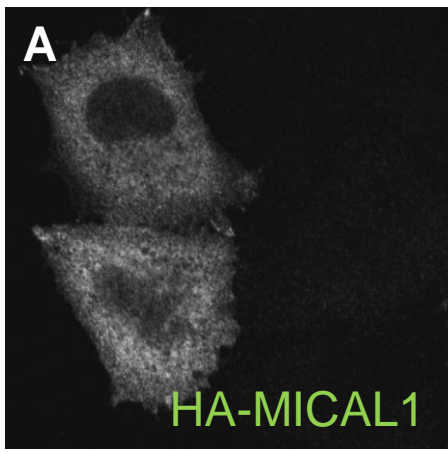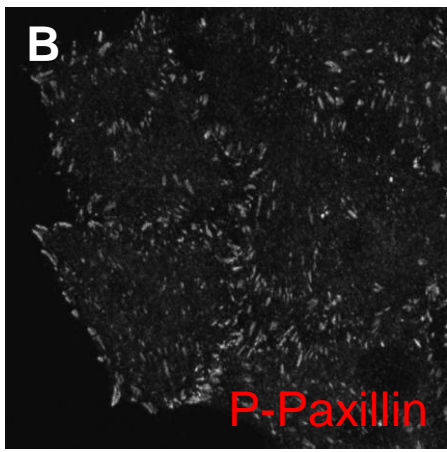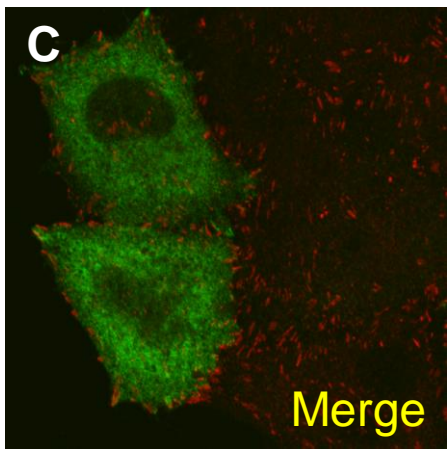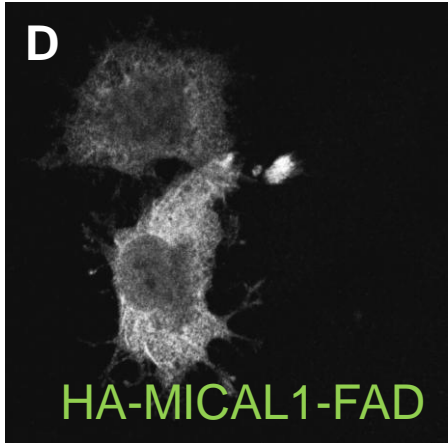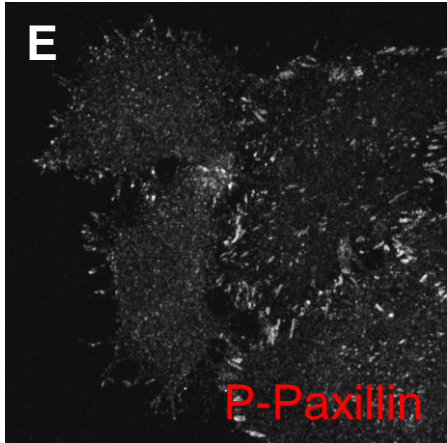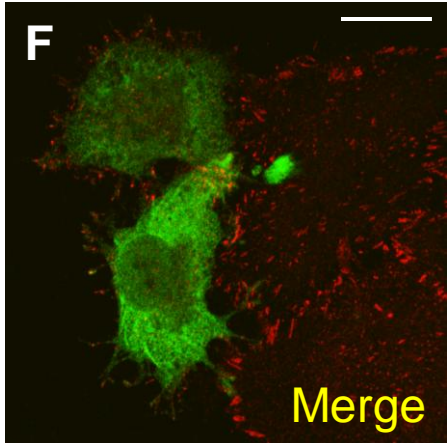

# Supplementary Fig. 3

**A** MICAL1 CC domain (925-961 residues):  
FCKAQTIQRRRLNEIE**A**ALRELEAEGVKLELALRRQSS

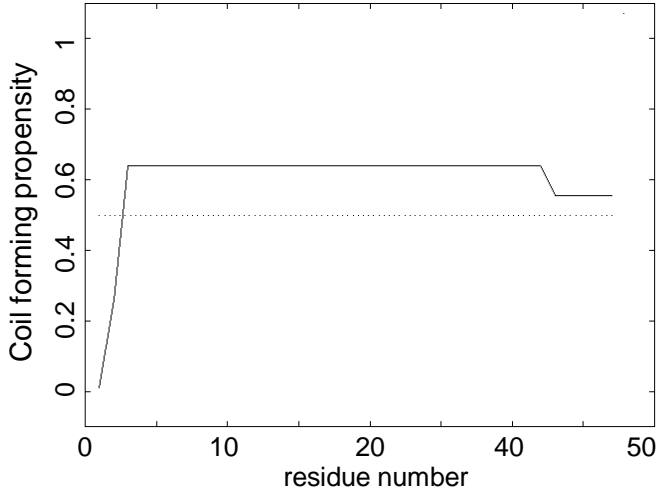

**B** MICAL1 CC domain (925-961 residues) A940P, A941P:  
FCKAQTIQRRRLNEIE**P**PLRELEAEGVKLELALRRQSS

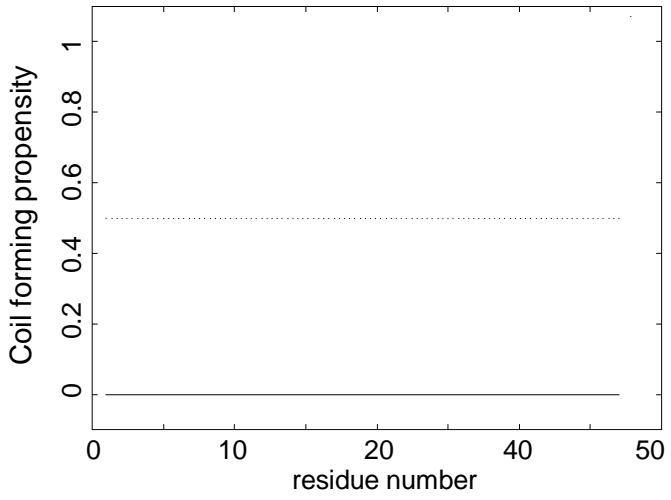

# Supplementary Fig. 4

MICAL2/MICAL1

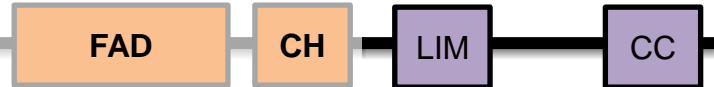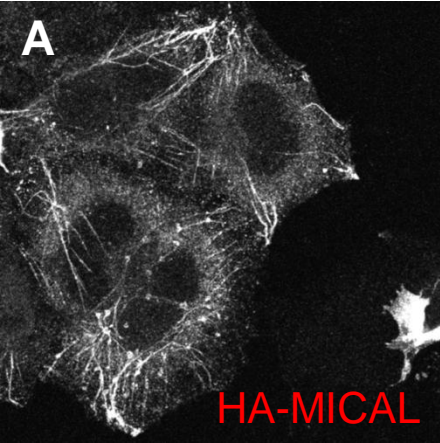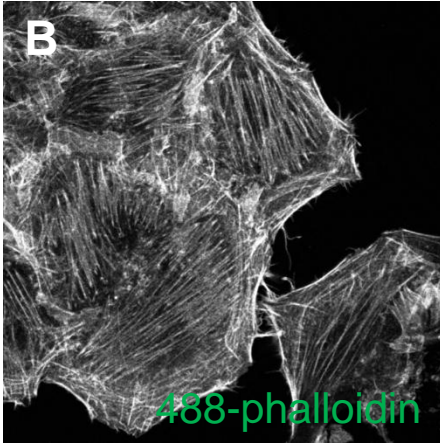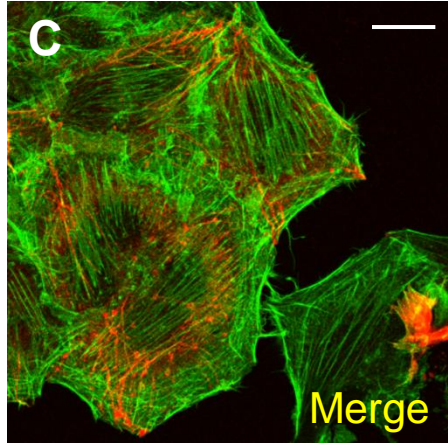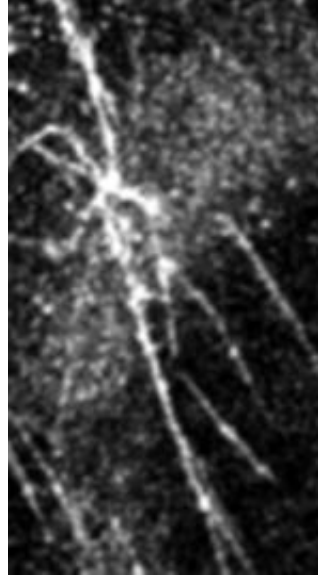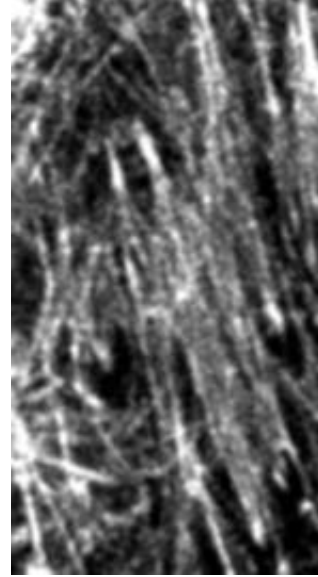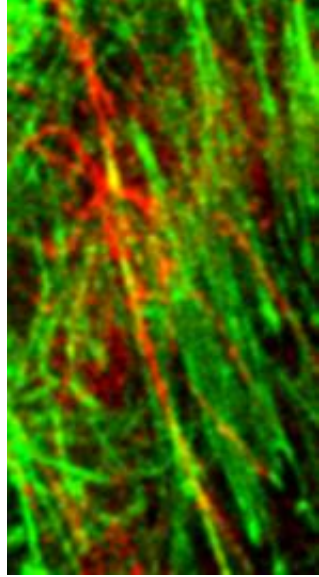

# Supplementary Fig. 5A

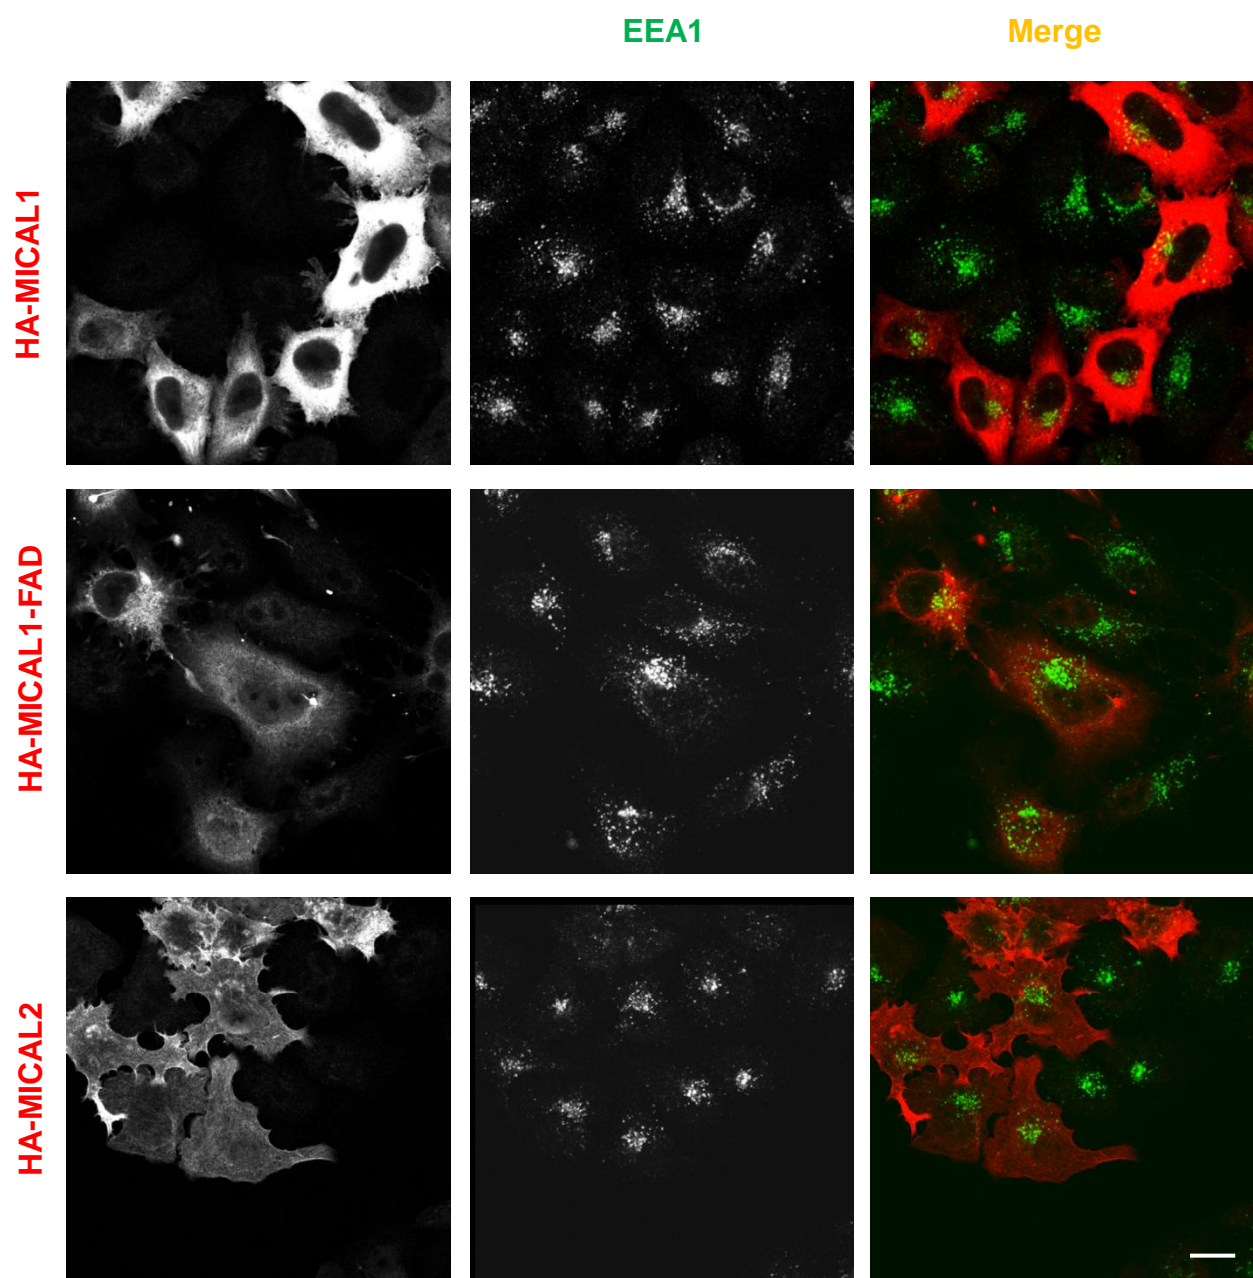

# Supplementary Fig. 5B

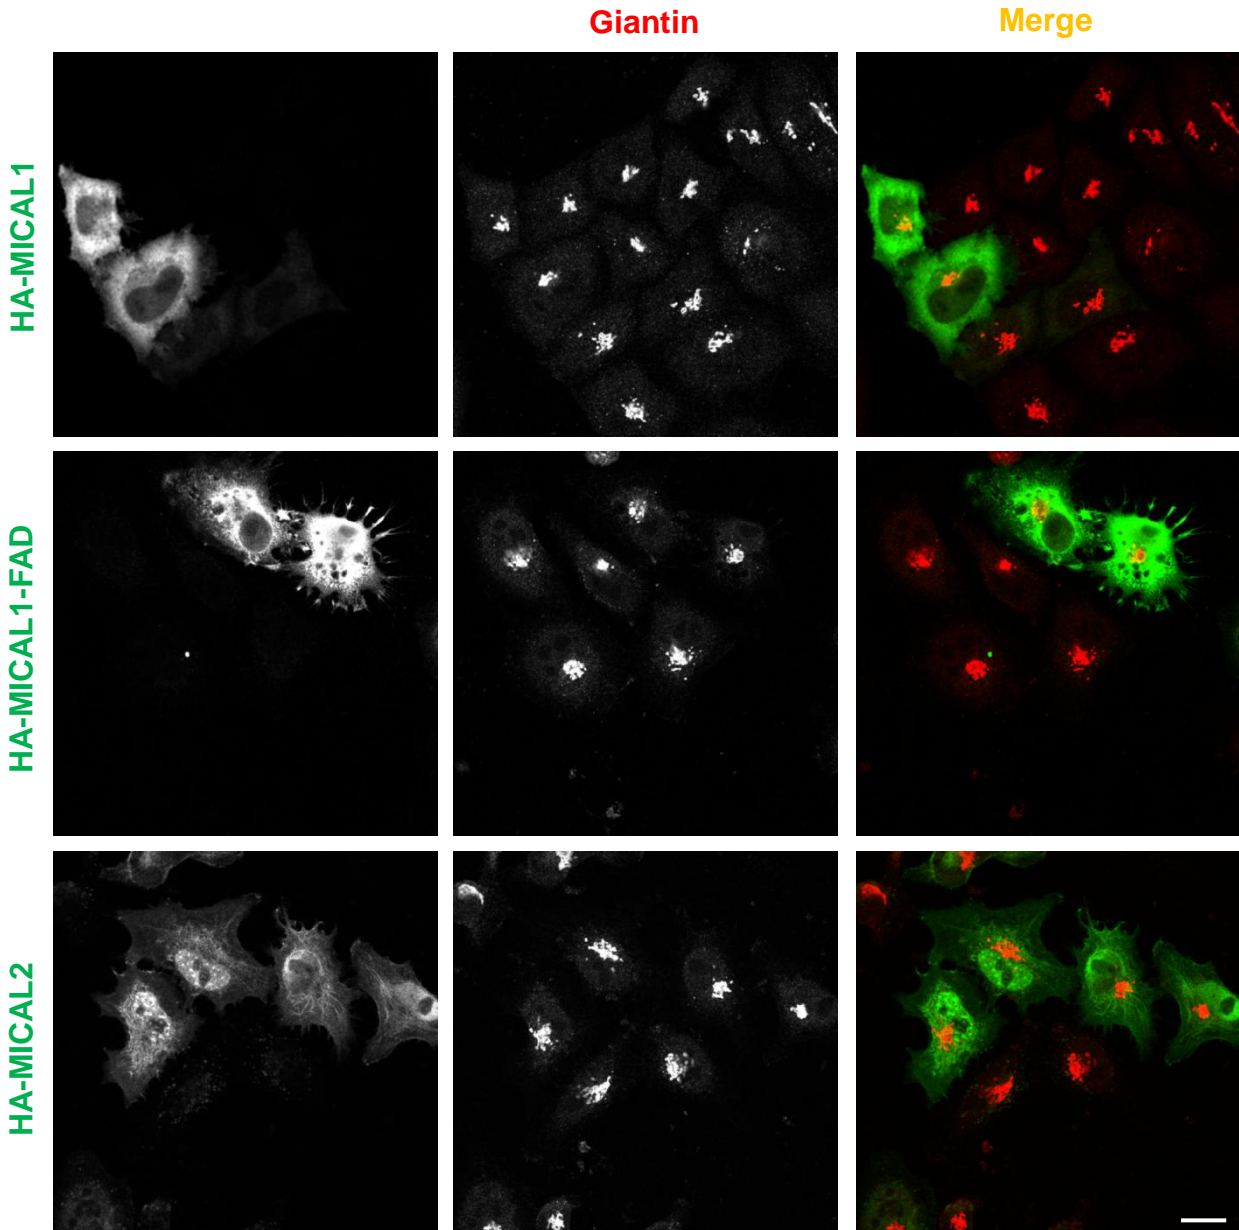

# Supplementary Fig. 5C

$\alpha$ -tubulin

Merge

HA-MICAL1

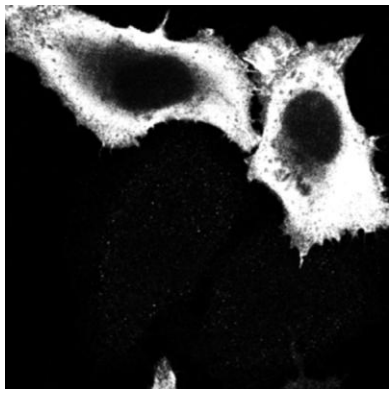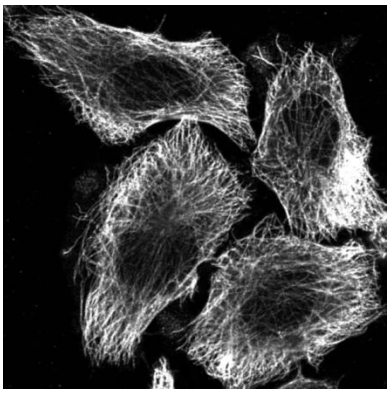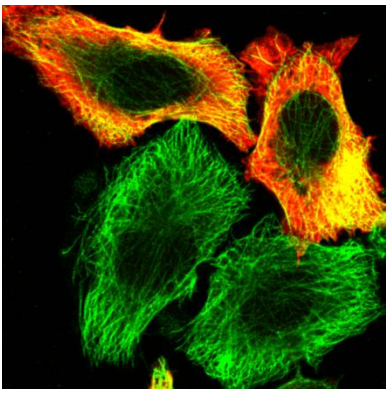

HA-MICAL1-FAD

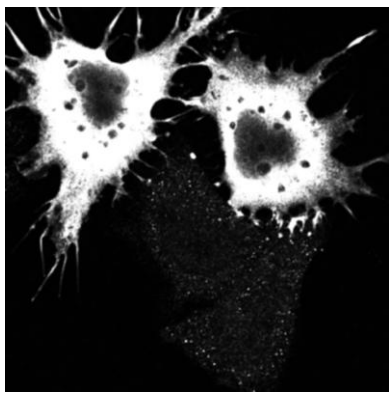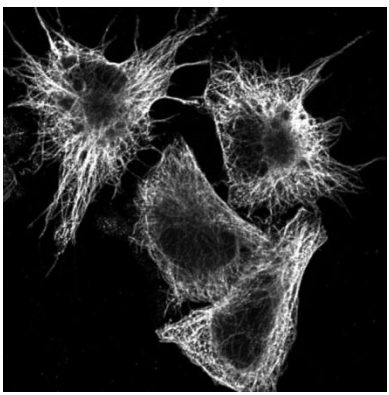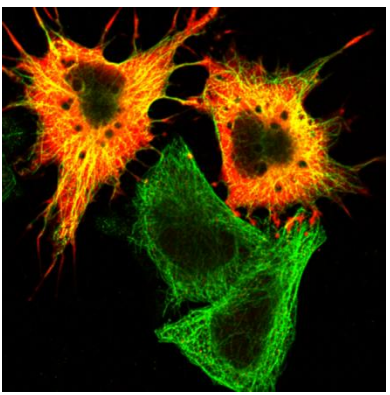

HA-MICAL2

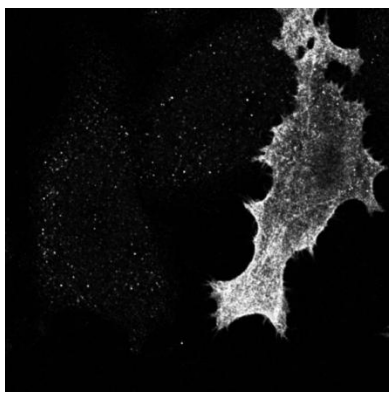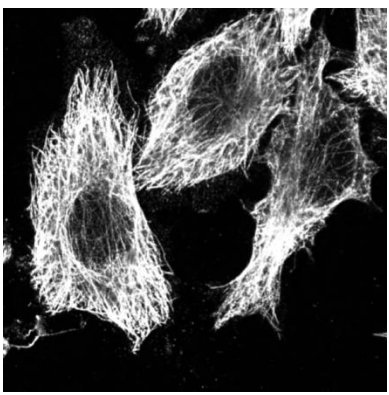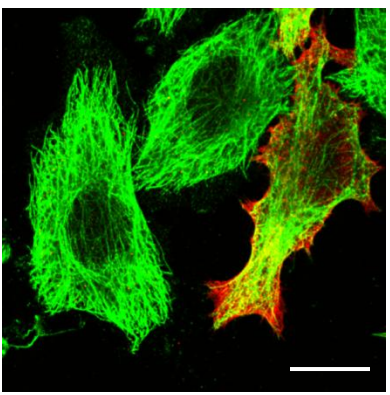

# Supplementary Fig. 5D

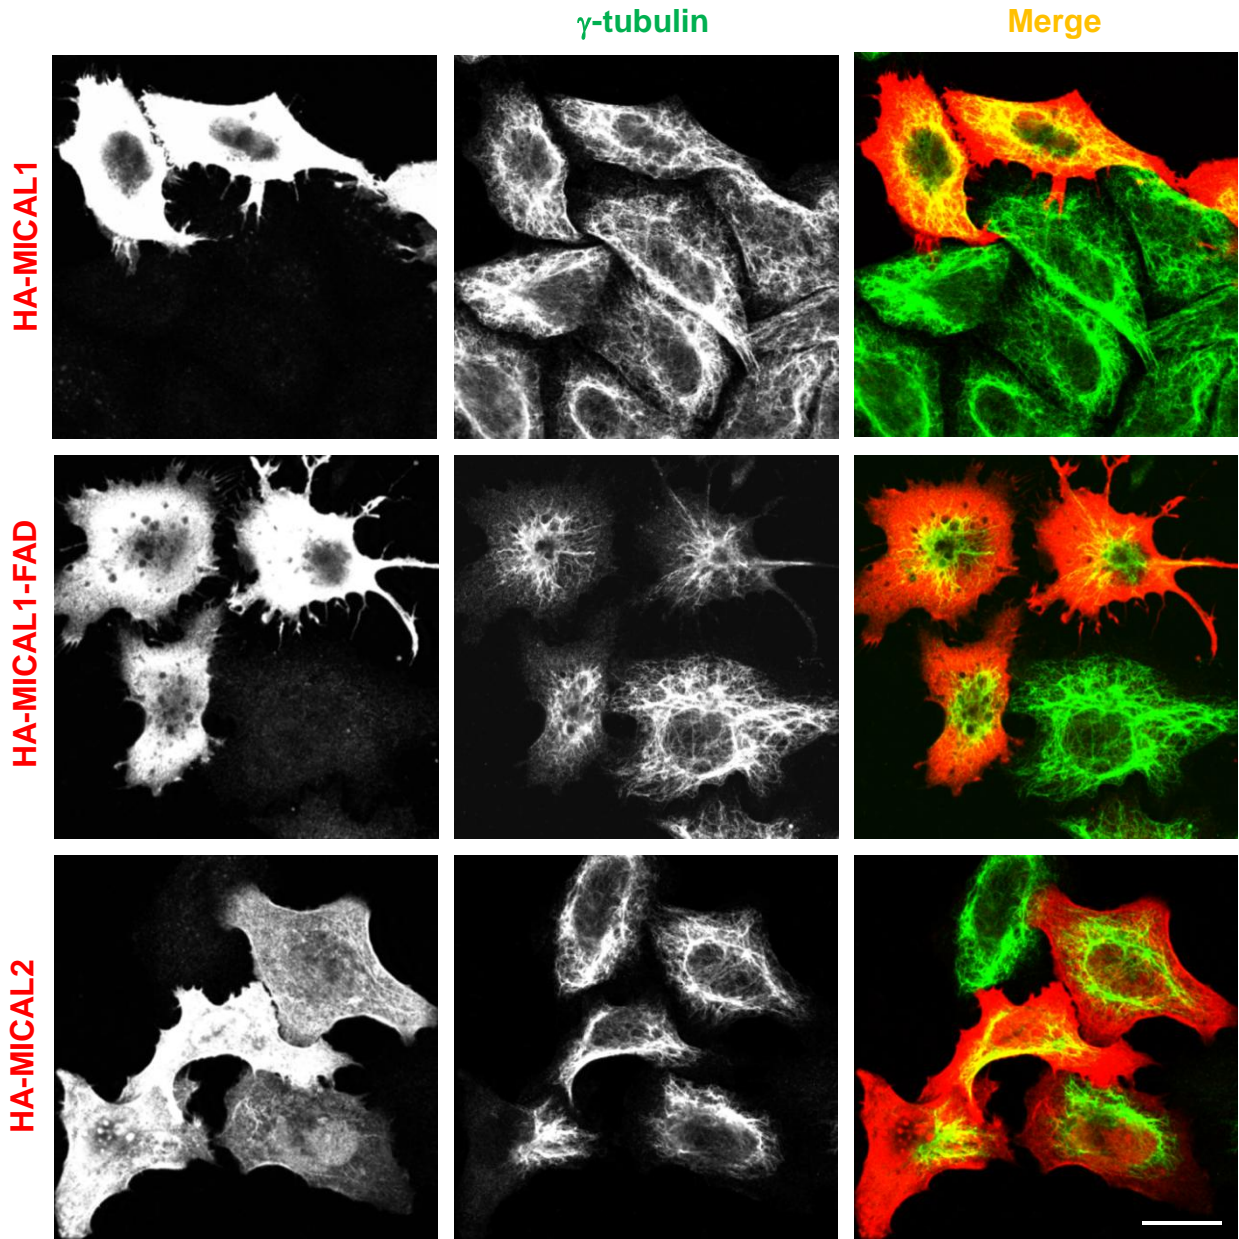



# Supplementary Fig. 6

**Mock**

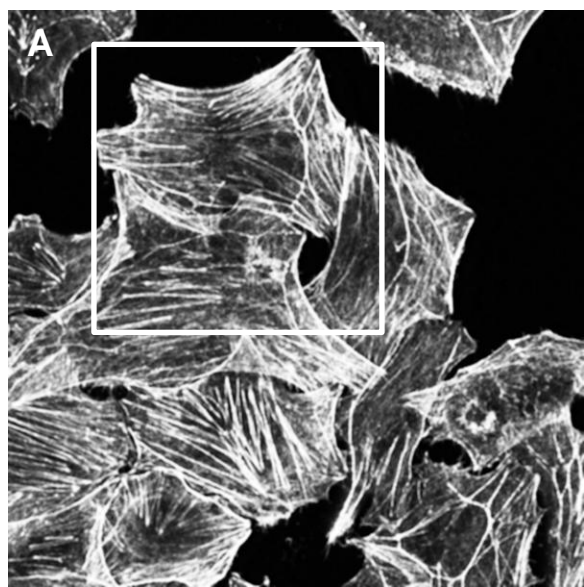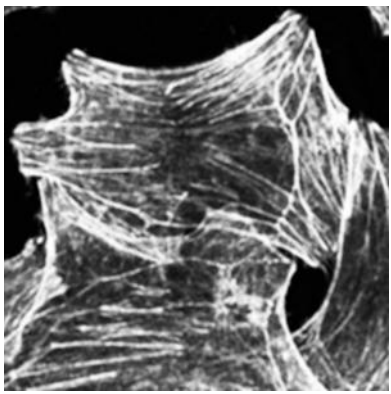

**MICAL3-SiRNA**

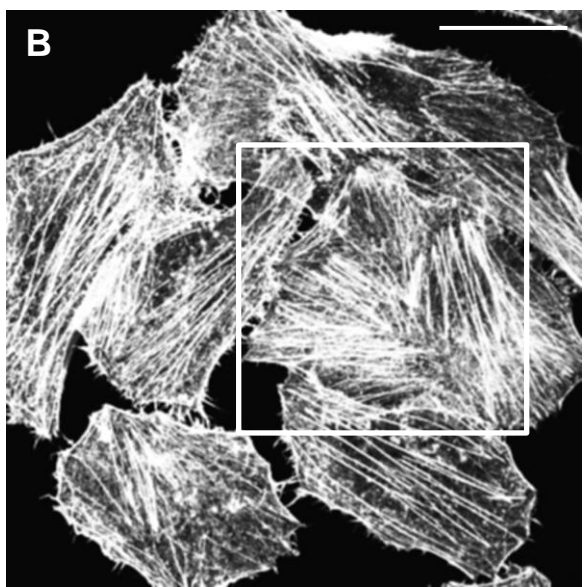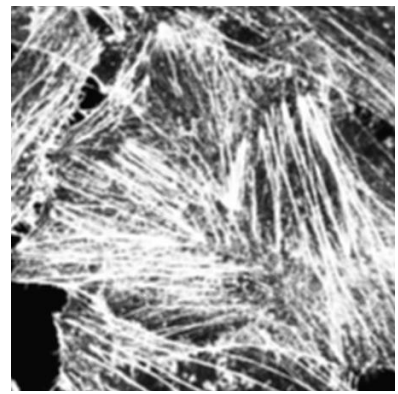

# Supplementary Fig. 7

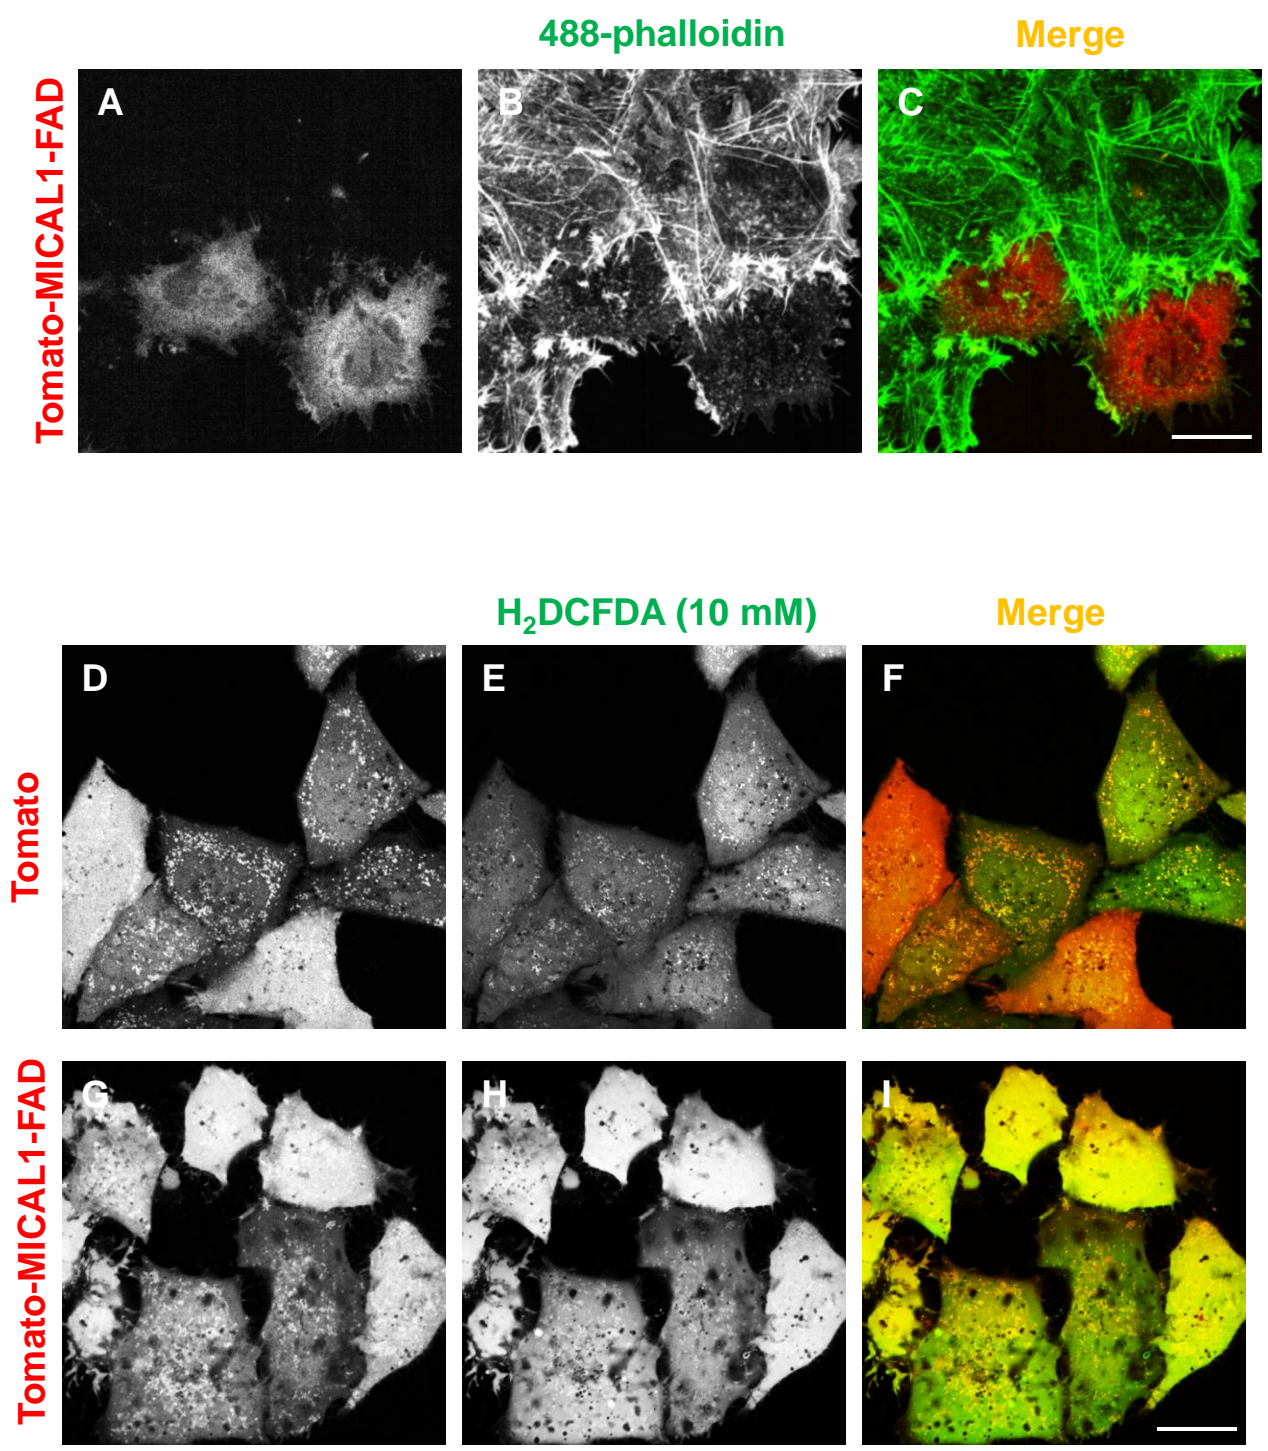

Supplement: jcs089367figss1-s7.pdf [file jcs089367figss1-s7.pdf]
